# Supplementary material
Source: MDPI journal article supplement (https://www.mdpi.com/2227-9717/6/6/63)
Supplement: s1 [file s1]

Archive with 10 entries (10 files):
- ./._TableS1.xlsx
- TableS1.xlsx
- ./._TableS2.xlsx
- TableS2.xlsx
- ./._Notebook_S1.pdf
- Notebook_S1.pdf
- ./._Notebook_S2.pdf
- Notebook_S2.pdf
- ./._Notebook_S3.pdf
- Notebook_S3.pdf
