# Supplementary material
Source: MDPI journal article supplement (https://www.mdpi.com/2227-9717/6/6/63)
Supplement: s1 [file s1 › TableS1.xlsx]

## Sheet: Sheet1
BiGG name	Common Name	Notes
CSm	Citrate Synthase	Mitochondria
ACONTm	Aconitase	Mitochondria
ICDHxm	Isocitrate Dehydrogenase	Mitochondria
AKGDam	alpha-Ketoglutarate Dehydrogenase	Mitochondria
SUCOASm	Succinate CoA Ligase	Mitochondria
SUCD1m	Succinate Dehydrogenase	Mitochondria
FUMm	Fumarase	Mitochondria
MDHm	Malate Dehydrogenase	Mitochondria
GAPD	Glyceraldehyde Phosphate Dehydrogenase	Cytoplasm
PGK	Phosphoglycerate kinase	Cytoplasm
TPI	Triose Phosphate Dehydrogenase	Cytoplasm
PEP_Carboxylase	Phosphoenolpyruvate carboxylase	Cytoplasm
FBA	Fructose-bisphosphate aldolase	Cytoplasm
TKT2	tranketolase, reaction 2	Cytoplasm
RPE	Ribulose 5-phosphate 3-epimerase	Cytoplasm
Xylulokinase	Xylulokinase	Cytoplasm
PYK	Pyruvate Kinase	Cytoplasm
RPI	Ribose-5-phosphate isomerase	Cytoplasm
TKT1	transketolase, reaction 1	Cytoplasm
TALA	Transaldolase	Cytoplasm
PGM	Phosphoglycerate mutase	Cytoplasm
ENO	Enolase	Cytoplasm
GND	Phosphogluconate dehydrogenase	Cytoplasm
PGL	6-phosphogluconolactonase	Cytoplasm
HEX1	Hexokinase	Cytoplasm
PGI	Glucose-6-phosphate isomerase	Cytoplasm
G6PDH2r	Glucose 6-phosphate dehydrogenase	Cytoplasm
PFK	Phosphofructokinase	Cytoplasm
PYRt2m	Pyruvate mitochondrial transport	Cytoplasm to Mitochondria transport
PDHm	Pyruvate Dehydrogenase	Mitochondria
