# Supplementary material
Source: MDPI journal article supplement (https://www.mdpi.com/2227-9717/6/6/63)
Supplement: s1 [file s1 › TableS2.xlsx]

## Sheet: Sheet1
BiGG name	Common name: Compartment	Notes
2pg_c	2-PHOSPHO-D-GLYCERATE:CYTOSOL
3pg_c	3-PHOSPHO-D-GLYCERATE:CYTOSOL
13dpg_c	3-PHOSPHO-D-GLYCEROYL_PHOSPHATE:CYTOSOL
6pgc_c	6-PHOSPHO-D-GLUCONATE:CYTOSOL
adp_c	ADP:CYTOSOL
atp_c	ATP:CYTOSOL
glc_D_c	BETA-D-GLUCOSE:CYTOSOL
g6p_c	BETA-D-GLUCOSE-6-PHOSPHATE:CYTOSOL
co2_c	CO2:CYTOSOL
e4p_c	D-ERYTHROSE-4-PHOSPHATE:CYTOSOL
fdp_c	D-FRUCTOSE_1,6-BISPHOSPHATE:CYTOSOL
f6p_c	D-FRUCTOSE_6-PHOSPHATE:CYTOSOL
6pgl_c	D-GLUCONO-1,5-LACTONE_6-PHOSPHATE:CYTOSOL
g3p_c	D-GLYCERALDEHYDE-3-PHOSPHATE:CYTOSOL
r5p_c	D-RIBOSE-5-PHOSPHATE:CYTOSOL
ru5p_c	D-RIBULOSE-5-PHOSPHATE:CYTOSOL
xu5p_c	D-XYLULOSE-5-PHOSPHATE:CYTOSOL
dhap_c	GLYCERONE_PHOSPHATE:CYTOSOL
h2o_c	H2O:CYTOSOL
nad_c	NAD+:CYTOSOL
nadh_c	NADH:CYTOSOL
nap_c	NADP+:CYTOSOL
nadph_c	NADPH:CYTOSOL
pi_c	ORTHOPHOSPHATE:CYTOSOL
pep_c	PHOSPHOENOLPYRUVATE:CYTOSOL
pyr_c	PYRUVATE:CYTOSOL
s17bp_c	SEDOHEPTULOSE_1,7-BISPHOSPHATE:CYTOSOL
s7p_c	SEDOHEPTULOSE_7-PHOSPHATE:CYTOSOL
mal_L_m	(S)-MALATE:MITOCHONDRIA
akg_m	2-OXOGLUTARATE:MITOCHONDRIA
accoa_m	ACETYL-COA:MITOCHONDRIA
adp_m	ADP:MITOCHONDRIA
atp_m	ATP:MITOCHONDRIA
cit_m	CITRATE:MITOCHONDRIA
co2_m	CO2:MITOCHONDRIA
coa_m	COA:MITOCHONDRIA
fum_m	FUMARATE:MITOCHONDRIA
h2o_m	H2O:MITOCHONDRIA
icit_m	ISOCITRATE:MITOCHONDRIA
nad_m	NAD+:MITOCHONDRIA
nadh_m	NADH:MITOCHONDRIA
pi_m	ORTHOPHOSPHATE:MITOCHONDRIA
oaa_m	OXALOACETATE:MITOCHONDRIA
pyr_m	PYRUVATE:MITOCHONDRIA
fadh2_m	REDOX1:MITOCHONDRIA	The redox pair employed to shuttle electrons into the mitochondrial respiratory chain were taken to have equal chemical potentials, as done in previous modeling of the TCA cycle11
fad_m	REDOX2:MITOCHONDRIA
succoa_m	SUCCINATE:MITOCHONDRIA
succ_m	SUCCINYL-COA:MITOCHONDRIA
